# Supplementary material for: Overexpression of the Auxin Receptor AFB3 in Arabidopsis Results in Salt Stress Resistance and the Modulation of NAC4 and SZF1
Source: PubMed Central journal article supplement (PMC7765236; doi:10.3390/ijms21249528), 2020-12-15
Supplement: ijms-21-09528-s001.pdf [file ijms-21-09528-s001.pdf]

## Overexpression of the Auxin Receptor *AFB3* in *Arabidopsis* Results in Salt Stress Resistance and the Modulation of *NAC4* and *SZF1*

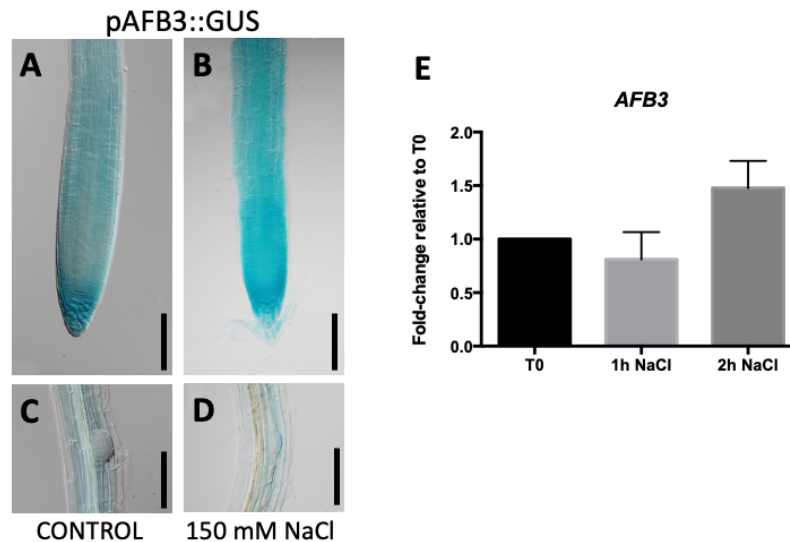

**Figure S1.** *AFB3* auxin receptor is not induced in roots at the transcriptional level under salt stress response. 3-days-old *pAFB3::GUS* (A,B,C,D) lines were transferred onto MS medium supplemented with 0 (A,C) or 150 mM of NaCl (B,D) for five days. At day 8 (das), seedlings were subjected to  $\beta$ -Glucuronidase (GUS) staining. A representative picture of each treatment is shown. (A,B) Meristematic/Elongation zone, (C,D) Lateral root. Bar = 0.2 mm. (E) 7-days-old Col-0 WT seedlings were transferred onto 0.5 $\times$  MS medium supplemented with 150 mM of NaCl. At the time of transfer (T0), 1 h and 2 h after NaCl treatment, whole roots were collected. *AFB3* transcript levels were analyzed by qRT-PCR using *Clathrin adaptor complex* as house-keeping gene. Fold-change was set for Col-0 WT (T0). Two-way ANOVA and Bonferroni a posteriori tests were performed and no significant differences were observed. Error bars represent the SEM. Each experiment was performed in triplicate with 25 seedlings each replicate.

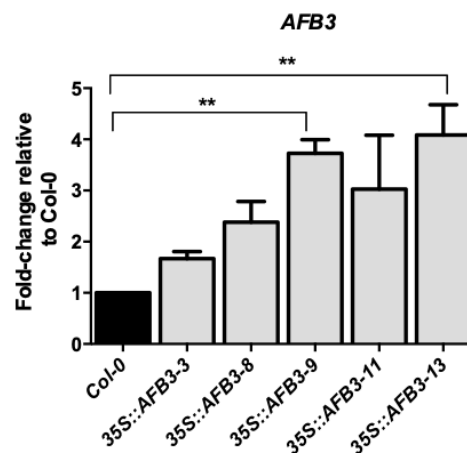

**Figure S2.** *p35S::AFB3* independent lines express higher levels of *AFB3* transcripts in roots. Roots from 10-days-old seedlings of each over-expression line and wild-type ecotype Col-0 WT were collected and qRT-PCR were performed. *AFB3* mRNA levels were normalized using *Clathrin adaptor complex* as a house-keeping gene. Fold-change was set using *AFB3* mRNA levels from Col-0 WT. One-way ANOVA and Bonferroni a posteriori tests were performed. \*\*:  $p < 0.005$ ; Error bars represent the Standard Error of the Mean (SEM). Each experiment was performed three times with  $n = 30$ .

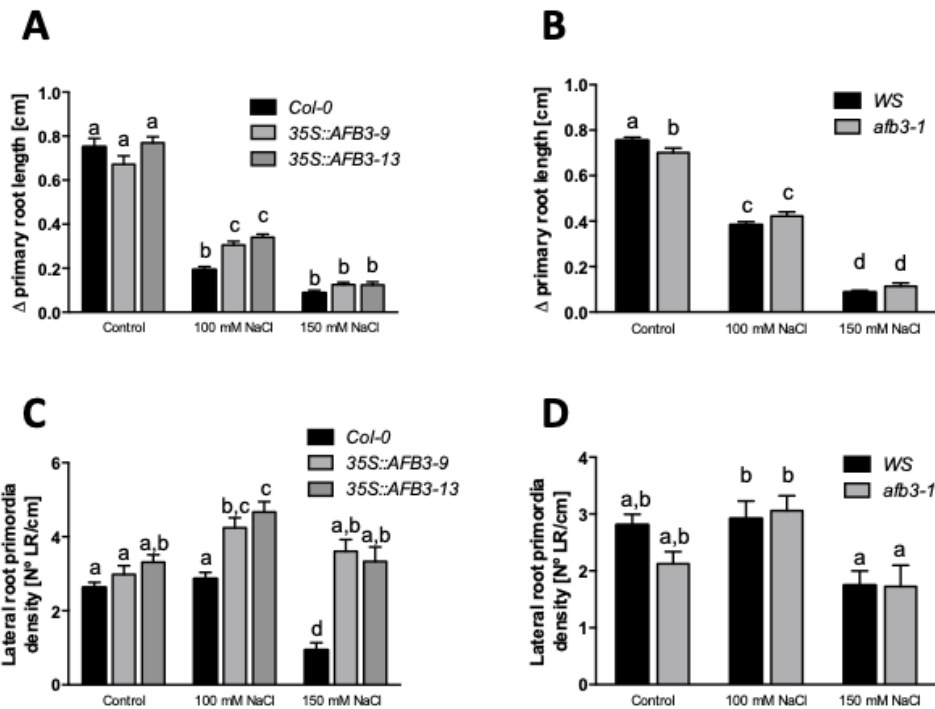

**Figure S3.** *AFB3* over-expression enhances salt stress tolerance in roots. 3-days-old Col-0 WT, *p35S::AFB3*, WS and *afb3-1* were transferred onto MS medium supplemented with 0, 100 or 150 mM of NaCl for two days. (A,B) Primary root growth after transfer to NaCl containing media and (C,D) lateral root primordia density was quantified. Two-way ANOVA and Bonferroni a posteriori tests were performed. a, b, c, d represents statistically significant differences with  $p < 0.05$ . Error bars represent the SEM. Each experiment was performed at least three independent times, with 12 seedlings each replicate.

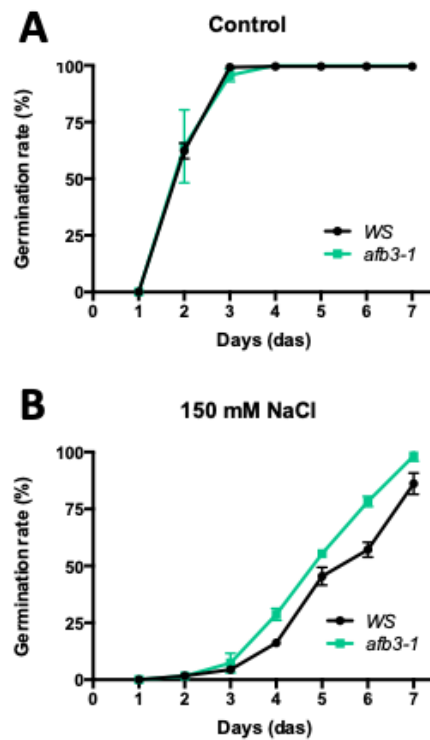

**Figure S4.** Impaired *AFB3* expression in *afb3-1* mutant does not affect germination rates under salt stress conditions. Germination rates of Col-0 WT and *afb3-1* mutant line were determined on 0.5× MS medium (A) and 0.5× MS medium containing 150 mM NaCl (B). One-way ANOVA and Bonferroni a posteriori tests were performed.

posteriori tests were performed and no significant difference was observed. Each experiment was performed three times with at least 100 seeds per treatment.

**Table S1.** DNA Sequences of primers for qRT-PCR and genotyping.

| <b>qRT-PCR Primers</b>    |                  |                                |
|---------------------------|------------------|--------------------------------|
| <b>Primer Name</b>        | <b>Gene</b>      | <b>Primer Sequence (5'–3')</b> |
| AtAFB3 fw                 | <i>At1G12820</i> | aggaagctggagataaggacagt        |
| AtAFB3 rv                 | <i>At1G12820</i> | aagggatcgattgttcgt             |
| AtNAC4 fw                 | <i>At5G07680</i> | ttcccttagtccatccaaccaga        |
| AtNAC4 rv                 | <i>At5G07680</i> | cttgcgtaagaaccggattgga         |
| AtSZF1 fw                 | <i>At3G55980</i> | cgcagctagagactacagggac         |
| AtSZF1 rv                 | <i>At3G55980</i> | agcttctctcagacaccacagtac       |
| AtCLAT fw                 | <i>At4G24550</i> | aatacgcgctgagttccctt           |
| AtCLAT rv                 | <i>At4G24550</i> | agcaccgggttctaactc             |
| AtOBP4 fw                 | <i>At5G60850</i> | gaacggctcaggttgagttt           |
| AtOBP4 rv                 | <i>At5G60850</i> | tgcatgatcaacggtactgg           |
| AtRD29A fw                | <i>At5G52310</i> | atcacttggctccactgttgttc        |
| AtRD29A rv                | <i>At5G52310</i> | acaaaacacataaacatccaaagtg      |
| AtZAT10 fw                | <i>At1G27730</i> | gagtcgagcactggacaaagg          |
| AtZAT10 rv                | <i>At1G27730</i> | gagcggagaagcatgaggcaa          |
| <b>Genotyping Primers</b> |                  |                                |
| <b>Primer Name</b>        | <b>Gene</b>      | <b>Primer Sequence (5'–3')</b> |
| nac4-2 fw                 | <i>At5G07680</i> | tgaggactaaccgagcaactc          |
| nac4-2 rv                 | <i>At5G07680</i> | aaccaccacaatgcattaac           |
| szf1-1 fw                 | <i>At3G55980</i> | agaagagtcagcacaagagcg          |
| szf1-1 rv                 | <i>At3G55980</i> | ttccagtggaaacgatgaaag          |
| afb3-1 fw                 | <i>At1G12820</i> | tcatgttgcttacaattgcg           |
| afb3-1 rv                 | <i>At1G12820</i> | tctgcaaacagatgacaaacgaaacg     |
